# Supplementary material for: Sugar-Sweetened Beverages and Artificially Sweetened Beverages Consumption and the Risk of Nonalcoholic Fatty Liver (NAFLD) and Nonalcoholic Steatohepatitis (NASH)
Source: MDPI journal article supplement (doi:10.3390/nu15183997), 2023-09-15
Supplement: s1 [file s1]

**Table S1. The effect of sugar intake from SSBs on risk of having NAFLD/NASH based on the multinomial logistical regression model.**

| Outcome                                 | Liver examination status |              |                      |              |                       |              |                      |              |                       |              |                      |              |
|-----------------------------------------|--------------------------|--------------|----------------------|--------------|-----------------------|--------------|----------------------|--------------|-----------------------|--------------|----------------------|--------------|
|                                         | Model 1                  |              |                      |              | Model 2               |              |                      |              | Model 3               |              |                      |              |
|                                         | NAFLD<br>vs<br>Normal    |              | NASH<br>vs<br>Normal |              | NAFLD<br>vs<br>Normal |              | NASH<br>vs<br>Normal |              | NAFLD<br>vs<br>Normal |              | NASH<br>vs<br>Normal |              |
|                                         | aOR                      | 95% CI       | aOR                  | 95% CI       | aOR                   | 95% CI       | aOR                  | 95% CI       | aOR                   | 95% CI       | aOR                  | 95% CI       |
| <b>Amounts of sugar intake from SSB</b> |                          |              |                      |              |                       |              |                      |              |                       |              |                      |              |
| none                                    | 1.0                      |              | 1.0                  |              | 1.0                   |              | 1.0                  |              | 1.0                   |              | 1.0                  |              |
| <36/25 g                                | 0.83                     | (0.55, 1.27) | 1.06                 | (0.63, 1.77) | 0.82                  | (0.56, 1.20) | 1.04                 | (0.67, 1.62) | 0.77                  | (0.54, 1.11) | 0.97                 | (0.61, 1.53) |
| ≥36/25 and <72/50 g                     | 1.19                     | (0.76, 1.86) | <b>1.71</b>          | (1.14, 2.55) | 1.17                  | (0.77, 1.77) | <b>1.75</b>          | (1.14, 2.68) | 1.04                  | (0.68, 1.58) | 1.39                 | (0.93, 2.08) |
| ≥72/50 g                                | <b>2.13</b>              | (1.57, 2.88) | <b>1.75</b>          | (1.24, 2.48) | <b>2.17</b>           | (1.59, 2.97) | <b>1.84</b>          | (1.21, 2.80) | <b>1.60</b>           | (1.05, 2.45) | 1.07                 | (0.62, 1.85) |

NAFLD was defined as simple steatosis without NASH.

Model 1 was adjusted for age, gender, race, and PIR.

Model 2 was adjusted for covariates in Model 1 and lifestyle pattern, including status of smoking, alcohol drinking, physical activity, and medical condition, daily dietary intake pattern, including total energy, total sugar, and total fat.

Model 3 was adjusted for covariates in Model 2 and BMI status.

No more than 36 g of added sugar for men and 25 g of added sugar for women was recommended by the American Heart Association (AHA) recommendation. For heavy SSB consumers, ≥72 and ≥50 g of sugar intake from SSBs for men and women were used in this study, respectively.

**Table S2. The effect of type of SSBs or ASBs consumption on risk of having NAFLD/NASH based on the multinominal logistical regression model.**

| Outcome                      | Liver examination status |              |                      |              |                       |              |                      |              |                       |              |                      |              |
|------------------------------|--------------------------|--------------|----------------------|--------------|-----------------------|--------------|----------------------|--------------|-----------------------|--------------|----------------------|--------------|
|                              | Model 1                  |              |                      |              | Model 2               |              |                      |              | Model 3               |              |                      |              |
|                              | NAFLD<br>vs<br>Normal    |              | NASH<br>vs<br>Normal |              | NAFLD<br>vs<br>Normal |              | NASH<br>vs<br>Normal |              | NAFLD<br>vs<br>Normal |              | NASH<br>vs<br>Normal |              |
|                              | aOR                      | 95% CI       | aOR                  | 95% CI       | aOR                   | 95% CI       | aOR                  | 95% CI       | aOR                   | 95% CI       | aOR                  | 95% CI       |
| <b>Type of soda intake</b>   |                          |              |                      |              |                       |              |                      |              |                       |              |                      |              |
| non-SSB intake               | 1.0                      |              | 1.0                  |              | 1.0                   |              | 1.0                  |              | 1.0                   |              | 1.0                  |              |
| non-soda intake <sup>1</sup> | 1.18                     | (0.78, 1.79) | 1.65                 | (1.00, 2.72) | 1.09                  | (0.73, 1.63) | <b>1.60</b>          | (1.03, 2.47) | 0.97                  | (0.66, 1.43) | 1.31                 | (0.90, 1.91) |
| ASB intake only <sup>2</sup> | <b>1.95</b>              | (1.23, 3.09) | <b>2.22</b>          | (1.02, 4.82) | <b>1.94</b>           | (1.21, 3.13) | 2.14                 | (0.97, 4.74) | <b>1.78</b>           | (1.04, 3.05) | 1.80                 | (0.76, 4.26) |
| regular soda only            | 1.52                     | (0.93, 2.49) | <b>2.15</b>          | (1.42, 3.27) | 1.33                  | (0.81, 2.17) | <b>2.03</b>          | (1.37, 3.02) | 1.13                  | (0.74, 1.72) | 1.53                 | (0.98, 2.39) |
| multiple types               | <b>2.03</b>              | (1.45, 2.86) | <b>1.71</b>          | (1.16, 2.51) | <b>1.74</b>           | (1.24, 2.45) | 1.57                 | (0.92, 2.67) | 1.40                  | (0.96, 2.04) | 1.08                 | (0.61, 1.91) |

NAFLD was defined as simple steatosis without NASH.

Model 1 was adjusted for age, gender, race, and PIR.

Model 2 was adjusted for covariates in Model 1 and lifestyle pattern, including status of smoking, alcohol drinking, physical activity, and medical condition, daily dietary intake pattern, including total energy, total sugar, and total fat.

Model 3 was adjusted for covariates in Model 2 and BMI status.

<sup>1</sup> Individuals who consumed sweetened drinks, other than ASB and regular soda were categorized into non-soda intake.

<sup>2</sup> Individuals who only consumed soda with no calories artificial sweetener were defined as ASB only.

Non-soda intake was defined based on SSBs consumer who did not intake ASBs and regular soda. ASBs-only consumers were defined as individuals who only consumed soda with no-calorie artificial sweetener. Individuals who consumed two or more types of SSBs or ASBs and with any types of SSBs were defined as multiple-SSBs consumers.
